1 **Machine learning and dengue forecasting: Comparing random forests and artificial neural**  
2 **networks for predicting dengue burdens at the national sub-national scale in Colombia**

3  
4 Naizhuo Zhao<sup>1,2</sup>, Katia Charland<sup>3</sup>, Mabel Carabali<sup>4</sup>, Elaine Nsoesie<sup>5</sup>, Mathieu Maher-Giroux<sup>4</sup>,  
5 Erin Rees<sup>6</sup>, Mengru Yuan<sup>4</sup>, Cesar Garcia Balaguera<sup>7</sup>, Gloria Jaramillo Ramirez<sup>7</sup>, Kate Zinszer<sup>3,8\*</sup>

6  
7 1. Institute of Land Resource Management, School of Humanities and Law, Northeastern  
8 University, Shenyang, Liaoning, China.

9 2. Division of Clinical Epidemiology, McGill University Health Centre, Montréal, QC, Canada.

10 3. Centre de recherche en santé publique, Université de Montréal et CIUSSS du Centre-Sud-de-  
11 l'Île-de-Montréal, Montréal, Québec, Canada

12  
13 4. Department of Epidemiology, Biostatistics, and Occupational Health, McGill University,  
14 Montréal, Quebec, Canada

15  
16 5. Department of Global Health, Boston University, Boston, Massachusetts, USA

17  
18 6. Public Health Risk Sciences Division, National Microbiology Laboratory, Public Health  
19 Agency of Canada, Saint-Hyacinthe, Québec, Canada

20  
21 7. Faculty of Medicine, Cooperative University of Colombia, Villavicencio, Meta, Colombia

22  
23 8. Department of Preventive and Social Medicine, University of Montreal, Montréal, Québec,  
24 Canada.

25  
26  
27 \*Corresponding author: Kate Zinszer  
28 E-mail: [kate.zinszer@umontreal.ca](mailto:kate.zinszer@umontreal.ca)

37 **Abstract:**

38 The robust estimate and forecast capability of random forests (RF) has been widely recognized,  
39 however this ensemble machine learning method has not been widely used in mosquito-borne  
40 disease forecasting. In this study, two sets of RF models were developed for the national and  
41 departmental levels in Colombia to predict weekly dengue cases at 12-weeks ahead. A national  
42 model based on artificial neural networks (ANN) was also developed and used as a comparator  
43 to the RF models. The various predictors included historic dengue cases, satellite-derived  
44 estimates for vegetation, precipitation, and air temperature, population counts, income inequality,  
45 and education. Our RF model trained on the national data was more accurate for department-  
46 specific weekly dengue cases estimation compared to a local model trained only on the  
47 department's data. Additionally, the forecast errors of the national RF model were smaller to  
48 those of the national ANN model and were increased with the forecast horizon increasing from  
49 one-week ahead (mean absolute error, MAE: 5.80; root mean squared error, RMSE: 11.10) to  
50 12-weeks ahead (MAE: 13.38; RMSE: 26.82). There was considerable variation in the relative  
51 importance of predictors dependent on forecast horizon. The environmental and meteorological  
52 predictors were relatively important for short-term dengue forecast horizons while socio-  
53 demographic predictors were relevant for longer-term forecast horizons. This study showed the  
54 potential of RF in dengue forecasting with also demonstrating the feasibility of using a national  
55 model to forecast at finer spatial scales. Furthermore, sociodemographic predictors are important  
56 to include to capture longer-term trends in dengue.

57

58

59

60 **Author summary:**

61 Dengue virus has the highest disease burden of all mosquito-borne viral diseases, infecting 390  
62 million people annually in 128 countries. Forecasting is an important warning mechanism that  
63 can help with proactive planning and response for clinical and public health services. In this  
64 study, we compare two different machine learning approaches to dengue forecasting: random  
65 forest (RF) and neural networks (NN). National and local (departmental-level) models were  
66 compared and used to predict dengue cases in the future. The results showed that the counts of  
67 future dengue cases were more accurately estimated by RF than by NN. It was also shown that  
68 environmental and meteorological predictors were more important for forecast accuracy for  
69 shorter-term forecasts while socio-demographic predictors were more important for longer-term  
70 forecasts. Finally, the national model applied to local data was more accurate in dengue  
71 forecasting compared to the local model. This research contributes to the field of disease  
72 forecasting and highlights different considerations for future forecasting studies.

73

74

75

76

77

78

79

80

81

## 82 **Introduction**

83           Dengue virus is most prevalent of the mosquito-borne viral diseases, infecting 390  
84 million people annually in 128 countries with four different virus serotypes [1]. Rising incidence  
85 and large-scale outbreaks are largely due to inadequate living conditions, naïve populations,  
86 global trade and population mobility, climate change, and the adaptive nature of the principal  
87 mosquito vectors *Aedes aegypti* and *Aedes albopictus* [2, 3]. The direct and indirect costs of  
88 dengue are substantial and impose enormous burdens on low- and middle-income tropical  
89 countries, with a global estimate of US\$8.9 billion in costs per year [4].

90           Human and financial costs of dengue can be alleviated when response systems, such as  
91 intervention strategies, health care services, supply chain management, receive timely warnings  
92 of future cases through forecasting models [5]. A number of dengue forecasting models have  
93 been developed and these models can be generally classified into two methodological categories:  
94 time-series and machine learning [6, 7]. The majority of existing dengue forecasting models used  
95 time-series methods and typically Autoregressive Integrated Moving Average (ARIMA), in  
96 which lagged meteorological factors (e.g. temperature and precipitation) act as covariates in  
97 conjunction with historical dengue data for one- to 12-week ahead forecasting [8-13]. Many  
98 studies reported that conventional time-series models such as ARIMA are insufficient to meet  
99 complex forecasting requirements [14-16], as multiple trends and outliers present in the time-  
100 series reduce the forecasting accuracy [17].

101           In the last two decades, machine learning (ML) methods have been used in many  
102 disciplines, such as geography, environment, and epidemiology, to yield meaningful findings  
103 from highly heterogeneous data. Machine learning statistical regression methods are promising  
104 approaches for disease forecasting as they facilitate the inclusion of a large number of correlated

105 variables, enable the modeling of complex interactions between variables, and can fit complex  
106 models without strong parametric assumptions that are often untestable in traditional statistical  
107 approaches [18, 19]. Decision trees, support vector machine, artificial neural network, K-nearest  
108 neighbor, gradient boosting, and naive Bayes are frequently used ML approaches in dengue-  
109 forecasting studies [7, 20-23]. Compared to the above ML methods, random forests (RF) have  
110 shown to be more accurate in forecasting given its ability to overcome the common problem of  
111 over-fitting through the use of bootstrap aggregation [24-28].

112 Random forests have been used to forecast dengue risk in several countries including  
113 Costa Rica [29], Philippines [30, 31] Pakistan [32], Peru and Puerto Rico [33]. However, time or  
114 seasonal variables were not always included in the models nor were sociodemographic  
115 predictors, which have been found to improve forecast accuracy in HIV [34] and Ebola [35]  
116 epidemic models. Furthermore, dengue models, regardless of the use of the time series or ML  
117 approaches, have been developed for predicting dengue cases in individual administrative areas  
118 such in a city or a province [9-12, 20-23]. Universal dengue prediction models that are effective  
119 across different administrative regions remain absent.

120 Historically, Colombia is one of the countries most affected by dengue, with the *Aedes*  
121 mosquito being widely distributed throughout all departments at elevations below 2,000 meters  
122 [36, 37]. The objective of this study was to evaluate the potential of RF forecasting models at the  
123 department and national level in Colombia. We compared the accuracy of the department and  
124 national RF models to understand the feasibility of using a national model to predict dengue  
125 cases for individual departments. We also compared errors of the national RF models with those  
126 of Artificial Neural Network (ANN), another classic and widely used ML approach. Finally, we  
127 estimated the change in importance of different predictors according to forecast horizon.

128 **Data and methods**

129 **Data**

130 Various data were used to develop the forecasting models, which included: dengue cases  
 131 from surveillance data, environmental indicators from remoting sensing data, and  
 132 sociodemographic indicators such as population, income inequity, and education coverage (Table  
 133 1). The dengue case surveillance data were extracted from an electronic platform, SIVIGILA,  
 134 created by the Colombia national surveillance program and was available at the department level.  
 135 The national surveillance program receives weekly reports from all public health facilities that  
 136 provide services to cases of dengue. The dengue cases reported by SIVIGILA were a mixture of  
 137 probable and laboratory confirmation. Laboratory confirmation for dengue is based on a positive  
 138 result from antigen, antibody, or virus detection and/or isolation [38]. Confirmation of probable  
 139 cases is largely based on clinical diagnosis plus at least one serological positive immunoglobulin  
 140 M test or an epidemiological link to a confirmed case 14 days prior to symptom onset.

141

142 **Table 1. Summary of study indicators and data sources**

| Indicator          | Source                                                     | Temporal granularity | Format  |
|--------------------|------------------------------------------------------------|----------------------|---------|
| Dengue cases       | The national surveillance program in Colombia              | Weekly               | Tabular |
| Rainfall           | CMORPH precipitation data from NOAA's CPC                  | Daily                | Gridded |
| EVI                | MOD13C1 from NASA's LP DAAC                                | 16-day               | Gridded |
| Temperature        | MOD11C2 from NASA's LP DAAC                                | 8-day                | Gridded |
| Population         | Colombian National Administrative Department of Statistics | Yearly               | Tabular |
| Gini index         | Colombian National Administrative Department of Statistics | Yearly               | Tabular |
| Education coverage | Colombian National Administrative Department of Statistics | Yearly               | Tabular |

143 CMORPH, Climate Prediction Center morphing method; CPC, Climate Prediction Center; EVI,  
 144 enhanced vegetation index; LP DAAC, Land Processes Distributed Active Archive Center;  
 145 NASA, National Aeronautics and Space Administration; NOAA, National Oceanic and  
 146 Atmospheric Administration.

147

148 Precipitation, air temperature, and land cover type have been shown to be three important  
 149 determinants of *Aedes* mosquito abundance and are often used as predictors in dengue

150 forecasting [9, 11, 21, 39]. In this study, precipitation data was obtained from the CMORPH  
151 (Climate Prediction Center morphing method) daily estimated precipitation dataset [40]. The  
152 land surface temperatures were extracted from the MODIS Terra Land Surface Temperature 8-  
153 day image products. Enhanced vegetation index (EVI) estimates were obtained from the MODIS  
154 Terra Vegetation Indices 16-Day image products. Several studies have shown that socio-  
155 demographic factors may influence dengue transmission and incidence as significantly as  
156 environmental factors [41-43]. Given this, we included population, Gini index (a measure of  
157 income inequity), and education coverage as potential predictors, which were retrieved from the  
158 Colombian National Administrative Department of Statistics. The study was approved by the  
159 Sciences and Health Ethical Committee of the University of Montreal (CERSES-19-018D), and  
160 all data were provided at the aggregate level and are publicly available.

### 161 *Random forests*

162 Random forests (RF) is an ensemble decision tree approach [44]. A decision tree is a  
163 simple representation for classification in which each internal node corresponds to a test on an  
164 attribute, each branch represents an outcome of a test, and each leaf (i.e. terminal node) holds a  
165 class label. Decision trees can also be used for regression when the target or outcome variable is  
166 continuous. Bootstrap aggregation, commonly known as bagging, is the most distinctive  
167 technique used in RF and bagging requires training each decision tree with a randomly selected  
168 subsample of the entire training datasets.

### 169 *Data preprocessing*

170 To ensure a consistent temporal granularity with the outcome variable, the daily  
171 precipitation data were aggregated to a weekly frequency. The 8-day land surface temperature  
172 and the 16-day EVI data were resampled to a weekly frequency using a spline interpolation [45].

173 We assigned a given department the same population, Gini index, and education coverage values  
174 for all weeks within the same calendar year.

175 The archipelago of San Andrés, Providencia, and Santa Catalina (commonly known as  
176 *San Andrés y Providencia*) is a department consisting of two island groups and 775 km away  
177 from mainland Colombia. Due to the frequent cloud contamination over the small island areas, it  
178 was not possible to have high-quality MODIS images products for weekly temperature or EVI  
179 value estimation. Vaupés department had only 30 confirmed dengue cases scattered in 24 weeks  
180 during 2014 to 2018. Thus, the departments of San Andrés y Providencia and Vaupés were  
181 excluded from this study, and data from the other 30 departments were used to train our models.

182 Weekly dengue data from 2014-2017 was used to train the RF models and the data from  
183 2018 was used to evaluate the models. To simulate ‘real life’ forecasting, we did not include the  
184 2018 data for the socio-demographic variables given that they are only produced annually  
185 whereas the remote sensing data are more readily available. Exponential smoothing approach  
186 based on historical (2010-2017) time-series data to estimate the values for 2018.

### 187 ***Development of RF models***

188 We first developed RF models for each department (referred to as local level). Let the  
189 “current” week be  $k$  and the number of confirmed dengue cases be  $y$ . Referring to the RF  
190 streamflow forecasting model developed by Papacharalampous and Tyrallis [46], we used the  
191 numbers of current and previous 11 weeks dengue cases (i.e.  $y_k, y_{k-1}, \dots, y_{k-10}, y_{k-11}$ ) of a  
192 department to predict one-week ahead dengue cases (i.e.  $y_{k+1}$ ) for each department. The current  
193 and previous 11 weeks of rainfall, land surface temperature, EVI, population, Gini index, and  
194 education coverage were also included as predictors. These values were selected as previous  
195 studies demonstrated that the optimal lags of meteorological variables used for dengue



196 forecasting are usually not larger than 12 weeks [47-52]. In addition, the ordinal number of the  
197 forecast week (1–52 for the year of 2015, 2016, 2017, and 2018 and 1–53 for 2014) as well as  
198 year (2014–2018) were treated as two predictor variables to account for seasonality and long-  
199 term changing trend of dengue occurrence [53,54].

200 We then developed RF models at the national scale. To train a national-scale RF model  
201 for forecasting  $n$ -week ahead dengue cases (where  $n \leq 12$ ), we used the same predictor and target  
202 variables as those used in the local  $n$ -week ahead forecasting models. The difference between the  
203 local and the national models was that the local  $n$ -week ahead models were trained using  $209-n$   
204 ( $209 = 53+52+52+52$ ) samples while the national model was trained using  $6270-30n$  [i.e.  $(209-n)$   
205  $\times 30$ ] samples.

#### 206 ***Model evaluation***

207 Model accuracy was evaluated and compared by two metrics: mean absolute error (MAE)  
208 and root mean squared error (RMSE). The MAEs and RMSEs reported in this study were  
209 calculated by the actual and the predicted numbers of dengue cases for the 52 weeks in 2018.  
210 The accuracy comparison was performed at the local (department) and national scales. When the  
211 comparison for an  $n$ -week ahead prediction was conducted at the national scale, the predicted  
212 numbers of dengue cases by the 30 local RF models were additively combined and compared  
213 with the actual national values to calculate one MAE and one RMSE. When the comparison was  
214 implemented at the local scale, the national RF model was applied to each one of the 30  
215 departments and then the predicted values were compared with the actual numbers of dengue  
216 cases to compute 30 individual MAEs and 30 individual RMSEs.

217 Artificial Neural Network (ANN) is an early ML approach and has been previously used  
218 to predict dengue cases [7, 20, 21, 23]. We developed ANN models at the national scale and

219 compared their prediction accuracy with that of the RF models. The ANN was composed of one  
220 input layer, one hidden layer, and one output layer. The ANN models had the same 53 predictor  
221 variables as the RF models, resulting in 53 neurons in the input layer and one neuron in the  
222 output layer. The number of neurons in the hidden layer was determined by iterative attempts  
223 until the prediction accuracy cannot be further improved [55]. In this study, the optimal number  
224 of neurons in hidden layer varied by forecasting horizon and ranged between 38 to 50.

225 Percentage of increased mean squared error (%IncMSE) is a robust and informative  
226 indicator to quantitatively evaluate the importance of predictor variables in a random forests  
227 model [56]. Percentage of increased mean squared error indicates the increase in the mean  
228 squared error (MSE) of prediction as a result of an independent variable being randomly shuffled  
229 while maintaining the other independent variables as unchanged [44]. A larger %IncMSE of a  
230 predictor variable suggests greater importance of the variable on the model's overall forecast  
231 accuracy and the %IncMSE was calculated for each predictor in each RF model.

## 232 **Results**

233 An exceptionally large dengue outbreak occurred in Colombia during the study period.  
234 The counts of confirmed dengue cases reached more than 2,500 per week by the end of 2015 and  
235 the outbreak ended mid-year in 2016. Following this outbreak, the yearly dengue case peaks  
236 were drastically reduced in 2016 and 2017 but began increasing again in 2018 (Fig1).

237  
238 Fig 1. The weekly total counts of confirmed dengue cases over Colombia for 2014-2018 (A) and  
239 the predicted counts of dengue cases by the national one-, two-, four-, eight-, and twelve-week  
240 ahead models for 2018 (B). See Fig S1 for the predicted counts of dengue cases for all week  
241 ahead models.  
242

243 For any of the n-week ahead ( $n \leq 12$ ) forecasts, the performance of the national model was  
244 better than that of the local model, demonstrated by the smaller overall MAE and RMSE (Table

245 2). Moreover, in most cases, a department's dengue cases were more accurately predicted by the  
246 national model than the local model (Fig 2). The errors of the national random forests model  
247 were mainly derived from under-estimation of cases which coincided with dramatic increases in  
248 cases towards the end of 2018. As expected, the under-estimation was more pronounced when  
249 predictions were made over a longer time period.  
250

251 **Table 2. Comparison of accuracy between the local and the national models**

| n-week ahead | Local RF model |       | National RF model |       | National ANN model |       |
|--------------|----------------|-------|-------------------|-------|--------------------|-------|
|              | MAE            | RMSE  | MAE               | RMSE  | MAE                | RMSE  |
| 1            | 8.01           | 14.74 | 5.80              | 11.10 | 8.81               | 13.02 |
| 2            | 9.10           | 17.05 | 6.76              | 13.43 | 10.59              | 15.86 |
| 3            | 10.14          | 19.24 | 7.64              | 14.79 | 11.72              | 18.17 |
| 4            | 11.05          | 21.67 | 8.52              | 16.20 | 12.70              | 19.89 |
| 5            | 12.14          | 24.14 | 9.23              | 17.76 | 14.13              | 22.15 |
| 6            | 12.86          | 25.80 | 10.08             | 18.89 | 15.12              | 27.15 |
| 7            | 13.50          | 27.25 | 10.77             | 20.55 | 16.73              | 28.07 |
| 8            | 13.94          | 28.04 | 11.46             | 22.19 | 18.06              | 28.27 |
| 9            | 14.36          | 29.09 | 11.95             | 23.50 | 18.62              | 28.99 |
| 10           | 14.67          | 29.66 | 12.51             | 24.82 | 20.34              | 32.38 |
| 11           | 14.91          | 30.15 | 12.93             | 25.90 | 21.25              | 33.14 |
| 12           | 15.21          | 30.66 | 13.38             | 26.82 | 21.93              | 33.89 |

268 MAE, mean absolute error; RMSE, root mean squared error; RF, random forests; ANN, artificial  
269 neural network.

270 Fig 2. Accuracy comparison between the local and the national random forests models at the  
271 department scale for the one-week ahead, four-week ahead, eight-week ahead, and twelve-week  
272 ahead predictions with RMSE for 2018. See Fig S2-S4 in the supporting information on MAE  
273 and for all week ahead models.  
274

275 The overall RMSE of the ANN model developed at the national scale was smaller than  
276 that of the local RF model at forecasting horizons of 5 weeks or less (Table 2). The RMSE grew  
277 for the ANN model with longer forecasting horizons compared to the local RF model. The MAE  
278 of the ANN model was consistently larger than that of the local RF model for each forecasting

279 horizon. The RMSE and MAE of the national RF model were smaller than those of the national  
280 ANN model at any forecasting horizon.

281         The relative importance of different predictor variables in the national RF model was  
282 varied (Table 3). Firstly, “current” and “near current” past dengue data were extremely important  
283 in predicting occurrence of dengue in the near future (e.g. one- to three-weeks ahead). However,  
284 with the predicted week increasingly further away from the “current” week, the importance of  
285 historical dengue data decreased while the “current” week of dengue cases remained one of the  
286 top three most important predictors in predicting the future dengue cases. Secondly, the  
287 environmental (EVI) and the meteorological predictors (rainfall and temperature) were more  
288 important than the socio-demographic predictors when dengue cases were predicted in the near  
289 future (one- to three-weeks ahead). Yet, with the predicted week increasingly far away from the  
290 “current” week, the three socio-demographic covariates (education, population, and Gini index)  
291 became increasingly important. Finally, the week predictor, which accounted for the seasonal  
292 pattern of dengue, was important across all forecasting horizons but relatively smaller in  
293 importance with smaller forecasting horizons (i.e.  $n \leq 4$ )

294  
295  
296

297 **Table 3. The top ten most important predictor variables for predicting dengue cases in the national models, ordered from the**  
 298 **largest to the smallest %IncMSEs**

| Rank          | 1                   | 2                     | 3                     | 4                     | 5                     | 6                           | 7                           | 8                           | 9                          | 10                          |
|---------------|---------------------|-----------------------|-----------------------|-----------------------|-----------------------|-----------------------------|-----------------------------|-----------------------------|----------------------------|-----------------------------|
| 1-week ahead  | Dengue <sub>k</sub> | Dengue <sub>k-1</sub> | Dengue <sub>k-2</sub> | Dengue <sub>k-3</sub> | Week                  | Dengue <sub>k-4</sub>       | EVI <sub>k-11</sub>         | Temperature <sub>k-11</sub> | EVI <sub>k-10</sub>        | EVI <sub>k-8</sub>          |
| 2-week ahead  | Dengue <sub>k</sub> | Dengue <sub>k-1</sub> | Week                  | Dengue <sub>k-2</sub> | Dengue <sub>k-3</sub> | Temperature <sub>k-11</sub> | Dengue <sub>k-4</sub>       | EVI <sub>k-7</sub>          | EVI <sub>k-5</sub>         | EVI <sub>k-8</sub>          |
| 3-week ahead  | Dengue <sub>k</sub> | Dengue <sub>k-1</sub> | Week                  | Dengue <sub>k-2</sub> | EVI <sub>k-8</sub>    | EVI <sub>k-10</sub>         | Temperature <sub>k-10</sub> | Education                   | Dengue <sub>k-3</sub>      | Dengue <sub>k-4</sub>       |
| 4-week ahead  | Dengue <sub>k</sub> | Week                  | Dengue <sub>k-1</sub> | Education             | Dengue <sub>k-2</sub> | Temperature <sub>k-9</sub>  | EVI <sub>k-8</sub>          | Temperature <sub>k-11</sub> | EVI <sub>k-7</sub>         | Dengue <sub>k-3</sub>       |
| 5-week ahead  | Dengue <sub>k</sub> | Week                  | Dengue <sub>k-1</sub> | Education             | Dengue <sub>k-2</sub> | EVI <sub>k-10</sub>         | Temperature <sub>k-8</sub>  | Temperature <sub>k</sub>    | Gini                       | EVI <sub>k-9</sub>          |
| 6-week ahead  | Dengue <sub>k</sub> | Week                  | Dengue <sub>k-1</sub> | Education             | Population            | Year                        | Dengue <sub>k-2</sub>       | EVI <sub>k-8</sub>          | EVI <sub>k-9</sub>         | EVI <sub>k-10</sub>         |
| 7-week ahead  | Dengue <sub>k</sub> | Week                  | Education             | Dengue <sub>k-1</sub> | Year                  | Dengue <sub>k-2</sub>       | Population                  | Gini                        | EVI <sub>k-10</sub>        | EVI <sub>k-9</sub>          |
| 8-week ahead  | Dengue <sub>k</sub> | Week                  | Population            | Education             | Dengue <sub>k-1</sub> | Year                        | Temperature <sub>k-11</sub> | Temperature <sub>k-5</sub>  | Dengue <sub>k-2</sub>      | Gini                        |
| 9-week ahead  | Dengue <sub>k</sub> | Week                  | Population            | Education             | Year                  | Dengue <sub>k-1</sub>       | Temperature <sub>k-11</sub> | Dengue <sub>k-11</sub>      | Gini                       | Temperature <sub>k-3</sub>  |
| 10-week ahead | Dengue <sub>k</sub> | Week                  | Year                  | Education             | Population            | Dengue <sub>k-1</sub>       | Gini                        | Dengue <sub>k-11</sub>      | Temperature <sub>k-4</sub> | Dengue <sub>k-2</sub>       |
| 11-week ahead | Year                | Week                  | Dengue <sub>k</sub>   | Population            | Education             | Gini                        | Dengue <sub>k-1</sub>       | Temperature <sub>k-11</sub> | Dengue <sub>k-10</sub>     | Temperature <sub>k-4</sub>  |
| 12-week ahead | Population          | Year                  | Dengue <sub>k</sub>   | Week                  | Education             | Gini                        | Dengue <sub>k-11</sub>      | Dengue <sub>k-1</sub>       | Dengue <sub>k-10</sub>     | Temperature <sub>k-10</sub> |

299 Dengue indicates historical dengue cases and EVI denotes enhanced vegetation index. %IncMSE, percentage of increased mean  
 300 squared error.

## 301 **Discussion**

302           In the current study, we developed a national model to predict counts of dengue cases  
303 across different departments of Colombia and found that for the majority of departments, the  
304 national model more accurately forecasted future dengue cases at the department level compared  
305 to the local model. This result indicates the similarity in importance of dengue drivers across  
306 different administrative regions of Colombia. Random forests is an unsupervised tree-based  
307 regression approach requiring a relatively large training sample for the repeated splitting of the  
308 dataset into separate branches, and thus the national model trained by a larger dataset had higher  
309 prediction accuracy compared to the local models. The national and the local models performed  
310 poorly in departments of Guainía and Vichada. The small population and consequently, the low  
311 counts of dengue cases resulted in the relatively large errors in the two departments.

312           We found that the meteorological and environmental variables were more important for  
313 prediction accuracy at smaller forecasting horizons compared to the socio-demographic  
314 variables, with socio-demographics being more important at larger forecasting horizons. This is  
315 likely due to the influence of meteorological and environmental conditions on *Aedes* mosquitoes  
316 and the lag effects are usually between 1 to 4 weeks for temperature and precipitation [57-59].  
317 Poor quality housing and sanitation management with high population density are key risk  
318 factors for dengue transmission [60, 61], and are closely related to education and poverty [62,  
319 63]. These results demonstrate the complimentary nature of these different groups of predictor  
320 variables and the importance of their inclusion in dengue forecasting models.

321           We used ANN models as comparators to our RF models. Artificial Neural Networks are  
322 brain-inspired systems that are intended to imitate the way that human learn. Theoretically, more  
323 complex correlations between predictor and target variables can be discerned by deeper (i.e.

324 more hidden layers) networks [64]. However, ANN cannot handle the problem of vanishing  
325 gradient which results in the failure of improving accuracy of ANN models by adding more  
326 hidden layers. Additionally, it is easy for ANN to suffer from over-fitting which leads to a  
327 network developed by a training dataset failing to predict the other observations accurately. In  
328 this study, the number of neurons in the hidden layer was required to be changed with each  
329 forecast horizon, demonstrating the poor universality of the ANN models. By contrast, RF solves  
330 the problem of over-fitting with the use of bootstrap aggregation. Hyperparameters (e.g. the  
331 number of decision trees) in RF are easy to be set and the RF models showed better universality  
332 for different forecast horizons.

333         Despite the strengths of our study, an important limitation with our RF approach is that  
334 the considerable dependence on the current week of dengue leads the model to generate lags for  
335 forecasting rapid changes in dengue. Including a predictor of mosquito abundance from an  
336 entomological surveillance program may reduce such time lag errors [65]. However, this type of  
337 data is often difficult to obtain at the national level with sufficient temporal and spatial  
338 granularity. Additionally, RF, as a non-parametric black-box approach, cannot intuitively display  
339 quantitative relationships between the count of dengue cases and the heterogeneous predictor  
340 variables, although it is able to more flexibly and accurately model the possibly complex non-  
341 linear and non-additive relationships among the variables. A more severe limitation of the RF  
342 model is the fact that RF cannot obtain values beyond the range of the variable in the training  
343 dataset. If an unprecedented dengue outbreak occurred in future, under-estimations will occur  
344 inevitably using the RF approach.

345

346

347 **Conclusions**

348           This study highlights the potential of RF for dengue forecasting and also demonstrates  
349 the benefits of including socio-demographic predictors. Our findings also found that a national  
350 model, on average, performed better compared to the local models. Future studies should  
351 consider the inclusion of other arboviruses as predictors, such as chikungunya and Zika as well  
352 as examine the importance of other socio-economic factors. In addition, other promising ML  
353 methods should be tested including recurrent neural networks, which inherently account for time,  
354 have the ability to deal with a vanishing gradient, and are able to capture complicated non-linear  
355 and non-additive relationships between predictor and target variables [66].

356

357

358

359

360

361

362

363

364

365

366

367

368



369 **References**

370 [1] Lambrechts L, Scott TW, Gubler DJ. Consequences of the expanding global distribution of  
371 *Aedes albopictus* for dengue virus transmission. *PLoS Neglected Tropical Diseases* 2010; 4(5):  
372 e646.

373 [2] Bhatt S, Gething PW, Brady OJ, Messina JP, Farlow AW, Moyes CL et.al. The global  
374 distribution and burden of dengue. *Nature* 2013; 496:504-507.

375 [3] Morin CW, Comrie AC, Ernst K. Climate and dengue transmission: evidence and  
376 implications. *Environmental Health Perspectives* 2013; 121(11-12): 1264.

377 [4] Shepard DS, Undurraga EA, Hallasa YA, Stanaway JD. The global economic burden of  
378 dengue: a systematic analysis. *Lancet Infectious Diseases* 2016; 16:935-941.

379 [5] Soyiri IN, Reidpath DD. An overview of health forecasting. *Environmental Health and*  
380 *Preventive Medicine* 2013; 18(1):1–9.

381 [6] Racloz V, Ramsey R, Tong S, Hu W. Surveillance of dengue fever virus: A review of  
382 epidemiological models and early warning systems. *PLoS Neglected Tropical Diseases* 2012;  
383 6(5):e1648.

384 [7] Gambhir S, Malik SK, Kumar Y, The diagnosis of dengue disease: An evaluation of three  
385 machine learning approaches. *International Journal of Healthcare Information Systems and*  
386 *Informatics* 2018; 13:1-19.

387 [8] Naish S, Dale P, Mackenzie JS, McBride J, Mengersen K, Tong S, Climate change and  
388 dengue: a critical and systematic review of quantitative modelling approaches. *BMC Infectious*  
389 *Diseases* 2014; 14:167.

- 390 [9] Gharbi M, Quenel P, Gustave J, Cassadou S, Ruche GL, Girdary L, et al. Time series analysis  
391 of dengue incidence in Guadeloupe, French West Indies: Forecasting models using climate  
392 variables as predictors. *BMC Infectious Diseases* 2011; 11:166.
- 393 [10] Hu W, Clements A, Williams G, Tong S, Dengue fever and El Niño/Southern Oscillation in  
394 Queensland, Australia: a time series predictive model. *Occupational & Environmental Medicine*  
395 2010; 67:307-311.
- 396 [11] Dom NC, Hassan AA, Latif ZA, Ismail R, Generating temporal model using climate  
397 variables for the prediction of dengue cases in Subang Jaya, Malasia. *Asian Pacific Journal of*  
398 *Tropical Disease* 2013; 3:352-361.
- 399 [12] Cortes F, Turchi Martelli CM, Arraes de Alencar Ximenes R, Montarroyos UR, Siqueira  
400 Junior JB, Gonçalves Cruz O, et al. Time series analysis of dengue surveillance data in two  
401 Brazilian cities. *Acta Tropica*. 2018; 182:190–7.
- 402 [13] Johansson MA, Reich NG, Hota A, Brownstein JS, Santillana M, Evaluating the  
403 performance of infectious disease forecasts: A comparison of climate-driven and seasonal  
404 dengue forecasts for Mexico. *Scientific Reports* 2016; 6:33707.
- 405 [14] Niu M, Wang Y, Sun S, Li Y, A novel hybrid decomposition-and-ensemble model based on  
406 CEEMD and GWO for short-term PM<sub>2.5</sub> concentration forecasting. *Atmospheric Environment*  
407 2016; 134:168-180.
- 408 [15] Chen M-Y, Chen B-T, A hybrid fuzzy time series model based on granular computing for  
409 stock price forecasting. *Information Sciences* 2015; 294:227-241.
- 410 [16] Wang P, Zhang H, Qin Z, Zhang G, A novel hybrid-Garch model based on ARIMA and  
411 SVM for PM<sub>2.5</sub> concentrations forecasting. *Atmospheric Pollution Research* 2017; 8: 850-860.

- 412 [17] Zhao N, Liu Y, Vanos JK, Cao G, Day-of-week and seasonal patterns of PM<sub>2.5</sub>  
413 concentrations over the United States: Time-series analyses using the Prophet procedure.  
414 Atmospheric Environment 2018; 192:116-127.
- 415 [18] Breiman L. Statistical modeling: the two cultures (with comments and a rejoinder by the  
416 author). Statistical Science 2001; 16(3): 199-231.
- 417 [19] Murphy KP. Machine Learning: a probabilistic perspective. MIT Press, 2012.
- 418 [20] Guo P, Liu T, Zhang Q, Wang L, Xiao J, Zhang Q, et al. Developing a dengue forecast  
419 model using machine learning: A case study in China. PLoS Neglected Tropical Diseases 2017;  
420 11:e0005973.
- 421 [21] Scavuzzo JM, Trucco F, Espinosa M, Tauro CB, Abril M, Scavuzzo CM, et al. Modeling  
422 dengue vector population using remotely sensed data and machine learning. Acta Tropica 2018;  
423 185:167-175.
- 424 [22] Althouse BM, Ng YY, Cummings DAT, Prediction of dengue incidence using serach query  
425 surveillance. PLoS Neglected Tropical Diseases 2011; 5:e1258.
- 426 [23] Laureano-Rosario, AE, Duncvan AP, Mendez-Lazaro, PA, Garcia-Rejon JE, Gomez-Carro  
427 S, Farfan-Ale J, et al. Application of artificial neural networks for dengue fever outbreak  
428 predictions in the northwest coast of Yucatan, Mexico and San Juan, Puerto Rico. Tropical  
429 Medicine and Infectious Disease 2018; 3:5.
- 430 [24] Raczko E, Zagajewski B, Comparison of support vector machine, random forest and neural  
431 network classifiers for tree species classification on airborne hyperspectral APEX images.  
432 European Journal of Remote Sensing 2017; 50:144-154.

- 433 [25] Meyer H, Kulhnlein M, Appelhans T, Nauss T, Comparison of four machine learning  
434 algorithms for their applicability in satellite-based optical rainfall retrievals. Atmospheric  
435 Research 2016; 169:424-433.
- 436 [26] Rodriguez-Galiano V, Sanchez-Castillo M, Chica-Olmo M, Chica-Rivas M, Machine  
437 learning predictive models for mineral prospectivity: An evaluation of neural networks, random  
438 forest, regression trees and support vector machines. Ore Geology Reviews 2015; 71:804-818.
- 439 [27] Statnikov A, Wang L, Aliferis CF, A comprehensive comparison of random forests and  
440 support vector machines for microarray-based cancer classification. BMC Bioinformatics 2008;  
441 9:319.
- 442 [28] Nsoesie EO, Beckman R, Marathe M, Lewis B, Prediction of an epidemic curve: A  
443 supervised classification approach. Statistical communications in infectious diseases.  
444 2011; 3(1):5.
- 445 [29] Vasquez P, Loria A, Sanchez F, Barboza LA, Climate-driven statistical models as effective  
446 predictors of local dengue incidence in Costa Rica: A generalized additive model and random  
447 forest approach. arXiv 2019; 1907.13095.
- 448 [30] Olmoguez ILG, Catindig MAC, Amongos MFL, Lazan AF, Developing a dengue  
449 forecasting model: A case study in Iligan city. International Journal of Advanced Computer  
450 Science and Applications 2019; 10(9):281–286.
- 451 [31] Carvajal TM, Viacrusis KM, Hernandez LFT, Ho HT, Amalin DM, Watanabe K, Machine  
452 learning methods reveal the temporal pattern of dengue incidence using meteorological factors in  
453 metropolitan Manila, Philippines. BMC Infectious Diseases 2018; 18:183.
- 454 [32] Rehman NA, Kalyanaraman S, Ahmad T, Pervaiz F, Saif U, Subramanian L, Fine-grained  
455 dengue forecasting using telephone triage services. Science Advances 2016; 2(7): e1501215.

- 456 [33] Freeze J, Erraguntla M, Verma A, Data integration and predictive analysis system for  
457 disease prophylaxis: Incorporating dengue fever forecasts. Proceedings of the 51<sup>st</sup> Hawaii  
458 International Conference on System Science 2018; 913-922.
- 459 [34] Dinh L, Chowell G, Rothenberg R, Growth scaling for the early dynamics of HIV/AIDS  
460 epidemics in Brazil and the influence of socio-demographic factors. Journal of Theoretical  
461 Biology 2018; 442:79-86.
- 462 [35] Chretien J-P, Riley S, George DB, Mathematical modeling of the West Africa Ebola  
463 epidemic. eLIFE 2015; 4:e09186.
- 464 [36] Cardona-Ospina JA, Villamil-Gómez WE, Jimenez-Canizales CE, Castañeda-Hernández  
465 DM, Rodríguez-Morales AJ. Estimating the burden of disease and the economic cost attributable  
466 to chikungunya, Colombia, 2014. Transactions of the Royal Society of Tropical Medicine and  
467 Hygiene 2015; 109(12):793–802.
- 468 [37] Villar LA, Rojas DP, Besada-Lombana S, Sarti E. Epidemiological trends of dengue disease  
469 in Colombia (2000-2011): a systematic review. PLoS Neglected Tropical Diseases 2015; 9(3):  
470 e0003499.
- 471 [38] Ospina Martinez ML, Martinez Duran ME, Pacheco García OE, Bonilla HQ, Pérez NT.,  
472 Protocolo de vigilancia en salud pública enfermedad por virus Zika. PRO-R02.056. Bogota  
473 (Colombia): Instituto Nacional de Salud, 2017. Available from:  
474 <http://bvs.minsa.gob.pe/local/MINSA/3449.pdf> (last accessed December 16, 2019).
- 475 [39] Beketov MA, Yurchenko YA, Belevich OE, Liess M, What environmental factors are  
476 important determinants of structure, species richness, and abundance of mosquito assemblages?  
477 Journal of Medical Entomology 2010; 47:129-139.

- 478 [40] Joyce RJ, CMORPH: A method that produces global precipitation estimates from passive  
479 microwave and infrared data at high spatial and temporal resolution. *Journal of*  
480 *Hydrometeorology* 2004; 5:487-503.
- 481 [41] Koyadun S, Butraporn P, Kittayapong P, Ecologic and sociodemographic risk determinants  
482 for dengue transmission in urban areas in Thailand. *Interdisciplinary Perspectives on Infectious*  
483 *Diseases* 2012; 2012:907494.
- 484 [42] Reiter P, Climate change and mosquito-borne disease. *Environmental Health Perspectives*  
485 2001; 109(supplement 1):141-161.
- 486 [43] Soghaier MA, Himatt S, Osman KE, Okoued SI, Seidahmed OE, Beatty ME, et al., Cross-  
487 sectional community-based study of the socio-demographic factors associated with the  
488 prevalence of dengue in the eastern part of Sudan in 2011. *BMC Public Health* 2015; 15:558.
- 489 [44] Breiman L, Random forests. *Machine learning* 2001; 45(1):5-32.
- 490 [45] Hulme M, New M. Dependence of large-scale precipitation climatologies on temporal and  
491 spatial sampling. *Journal of Climate*, 1997; 10:1099–1113,
- 492 [46] Papacharalampous GA, Tyrallis H, Evaluation of random forests and prophet for daily  
493 streamflow forecasting. *Advances in Geosciences* 2018; 45:201-208.
- 494 [47] Lu L, Lin H, Tian L, Yang W, Sun J, Liu Q, Time series analysis of dengue fever and  
495 weather in Guangzhou, China, *BMC Public Health* 2009; 9:395.
- 496 [48] Chen S-C, Liao C-M, Chio C-P, Chou H-H, You S-H, Cheng Y-H, lagged temperature  
497 effect with mosquito transmission potential explains dengue variability in southern Taiwan:  
498 Insights from a statistical analysis. *Science of The Total Environment* 2010; 408(19):469-4075.

- 499 [49] Cheong YL, Burkart K, Leitao PJ, Lakes T, Assessing weather effects on dengue disease in  
500 Malaysia, *International Journal of Environmental Research and Public Health* 2013;  
501 10(12):6319-6334.
- 502 [50] Chang K, Chen, C-D, Shih C-M, Lee T-C, Wu M-T, Wu D-C, et al., Time-lagging interplay  
503 effect and excess risk of meteorological/mosquito parameters and petrochemical gas explosion  
504 on dengue incidence. *Scientific reports* 2016; 6:35028.
- 505 [51] Chen Y, Ong JHY, Rajarethinam J, Yap G, Ng LC, Cook AR. Neighbourhood level real-  
506 time forecasting of dengue cases in tropical urban Singapore. *BMC Medicine* 2018;16(1):129.
- 507 [52] Eastin MD, Delmelle E, Casas I, Wexler J, Self C, Intra-and interseasonal autoregressive  
508 prediction of dengue outbreaks using local weather and regional climate for a tropical  
509 environment in Colombia. *The American Journal of Tropical Medicine and Hygiene* 2014;  
510 91(3):598-610.
- 511 [53] Bostan N, Javed S, Amen N, Eqani SAMAS, Tahir F, Bokhari H, Dengue fever virus in  
512 Pakistan: effects of seasonal pattern and temperature change on distribution of vector and virus.  
513 *Reviews in Medical Virology* 2017; 27(1):e1899.
- 514 [54] Oidtman RJ, Lai S, Huang Z, Yang J, Siraj AS, Reiner RC, et al., Inter-annual variation in  
515 seasonal dengue epidemics driven by multiple interacting factors in Guangzhou, China, *Nature*  
516 *Communications* 2019; 10:1148.
- 517 [55] Peng Z, Letu H, Wang T, Shi C, Zhao C, Tana G, Zhao N, Dai T, Tang R, Shang H, Shi J,  
518 Chen L. Estimation of shortwave solar radiation using the artificial neural network from  
519 Himawari-8 satellite imagery over China. *Journal of Quantitative Spectroscopy and Radiative*  
520 *Transfer* 2020; 240: 106672.

- 521 [56] Liu Y, Cao G, Zhao N, Mulligan K, Ye X. Improve ground-level PM<sub>2.5</sub> concentration  
522 mapping using a random forests-based geostatistical approach. *Environmental Pollution* 2018;  
523 235: 272-282.
- 524 [57] Grziwotz F, Strauß JF, Hsieh C-h, Telschow A. Empirical dynamic modelling identifies  
525 different responses of *Aedes Polynesiensis* subpopulations to natural environmental variables.  
526 *Scientific Reports* 2018; 8: 16768.
- 527 [58] da Cruz Ferreira DA, Degener CM, de Almeida Marques-Toledo, C, Bendati MM, Fetzer  
528 LO, Teixeira CP, Eiras AE. Meteorological variables and mosquito monitoring are good  
529 predictors for infestation trends of *Aedes aegypti*, the vector of dengue, chikungunya and  
530 Zika. *Parasites Vectors* 2017; 10: 78.
- 531 [59] Manica M, Filipponi F, D'Alessandro A, Screti A, Neteler M, Rosà R, et al. Spatial and  
532 Temporal Hot Spots of *Aedes albopictus* Abundance inside and outside a South European  
533 Metropolitan Area. *PLoS Neglected Tropical Diseases* 2016; 10(6): e0004758.
- 534 [60] Mulligan K, Dixon J, Sinn C-L J, Elliott SJ. Is dengue a disease of poverty? A systematic  
535 review. *Pathogens and Global Health* 2015; 109(1): 10-18.
- 536 [61] Tapia-Conyer R, Méndez-Galván JF, Gallardo-Rincón H. The growing burden of dengue in  
537 Latin America. *Journal of Clinical Virology* 2009; 46: S3-S6.
- 538 [62] Adams EA, Boateng GO, Amoyaw JA. Socioeconomic and demographic predictors of  
539 potable water and sanitation access in Ghana. *Social Indicators Research* 2016; 126(2): 673-687.
- 540 [63] de Janvry A, Sadoulet E. Growth, poverty, and inequality in Latin America: A causal  
541 analysis, 1970-94. *The review of Income and Wealth* 2000; 46(3): 267-287.
- 542 [64] Najafabadi MM, Villanustre F, Khoshgoftaar TM, Seliya N, Wald R, Muharemagic E. Deep  
543 learning applications and challenges in big data analytics. *Journal of Big Data* 2015; 2:1.



- 544 [65] Ong J, Liu X, Rajarethinam J, Kok, SY, Liang S, Tang, CS, et al., Mapping dengue risk in  
545 Singapore using random forest. PLoS Neglected Tropical Diseases 2018; 12(6):e0006587.
- 546 [66] Williams RJ, Zipser D, A learning algorithm for continually running fully recurrent neural  
547 networks. Neural Computation 1989; 1(2):270-280.

### **Support Information Legends**

Fig S1. The weekly total counts of confirmed dengue cases over Colombia for 2014-2018 (A) and the predicted counts of dengue cases by the national model for one to twelve-week ahead for 2018 (B).

Fig S2. Accuracy comparison between the local and the national random forests models at the department scale for the one-week ahead, four-week ahead, eight-week ahead, and twelve-week ahead predictions with MAE for 2018.

Fig S3. Accuracy comparison between the local and the national random forests models at the department scale for one to twelve-week ahead predictions with RSME for 2018.

Fig S4. Accuracy comparison between the local and the national random forests models at the department scale for one to twelve-week ahead predictions with MAE for 2018.

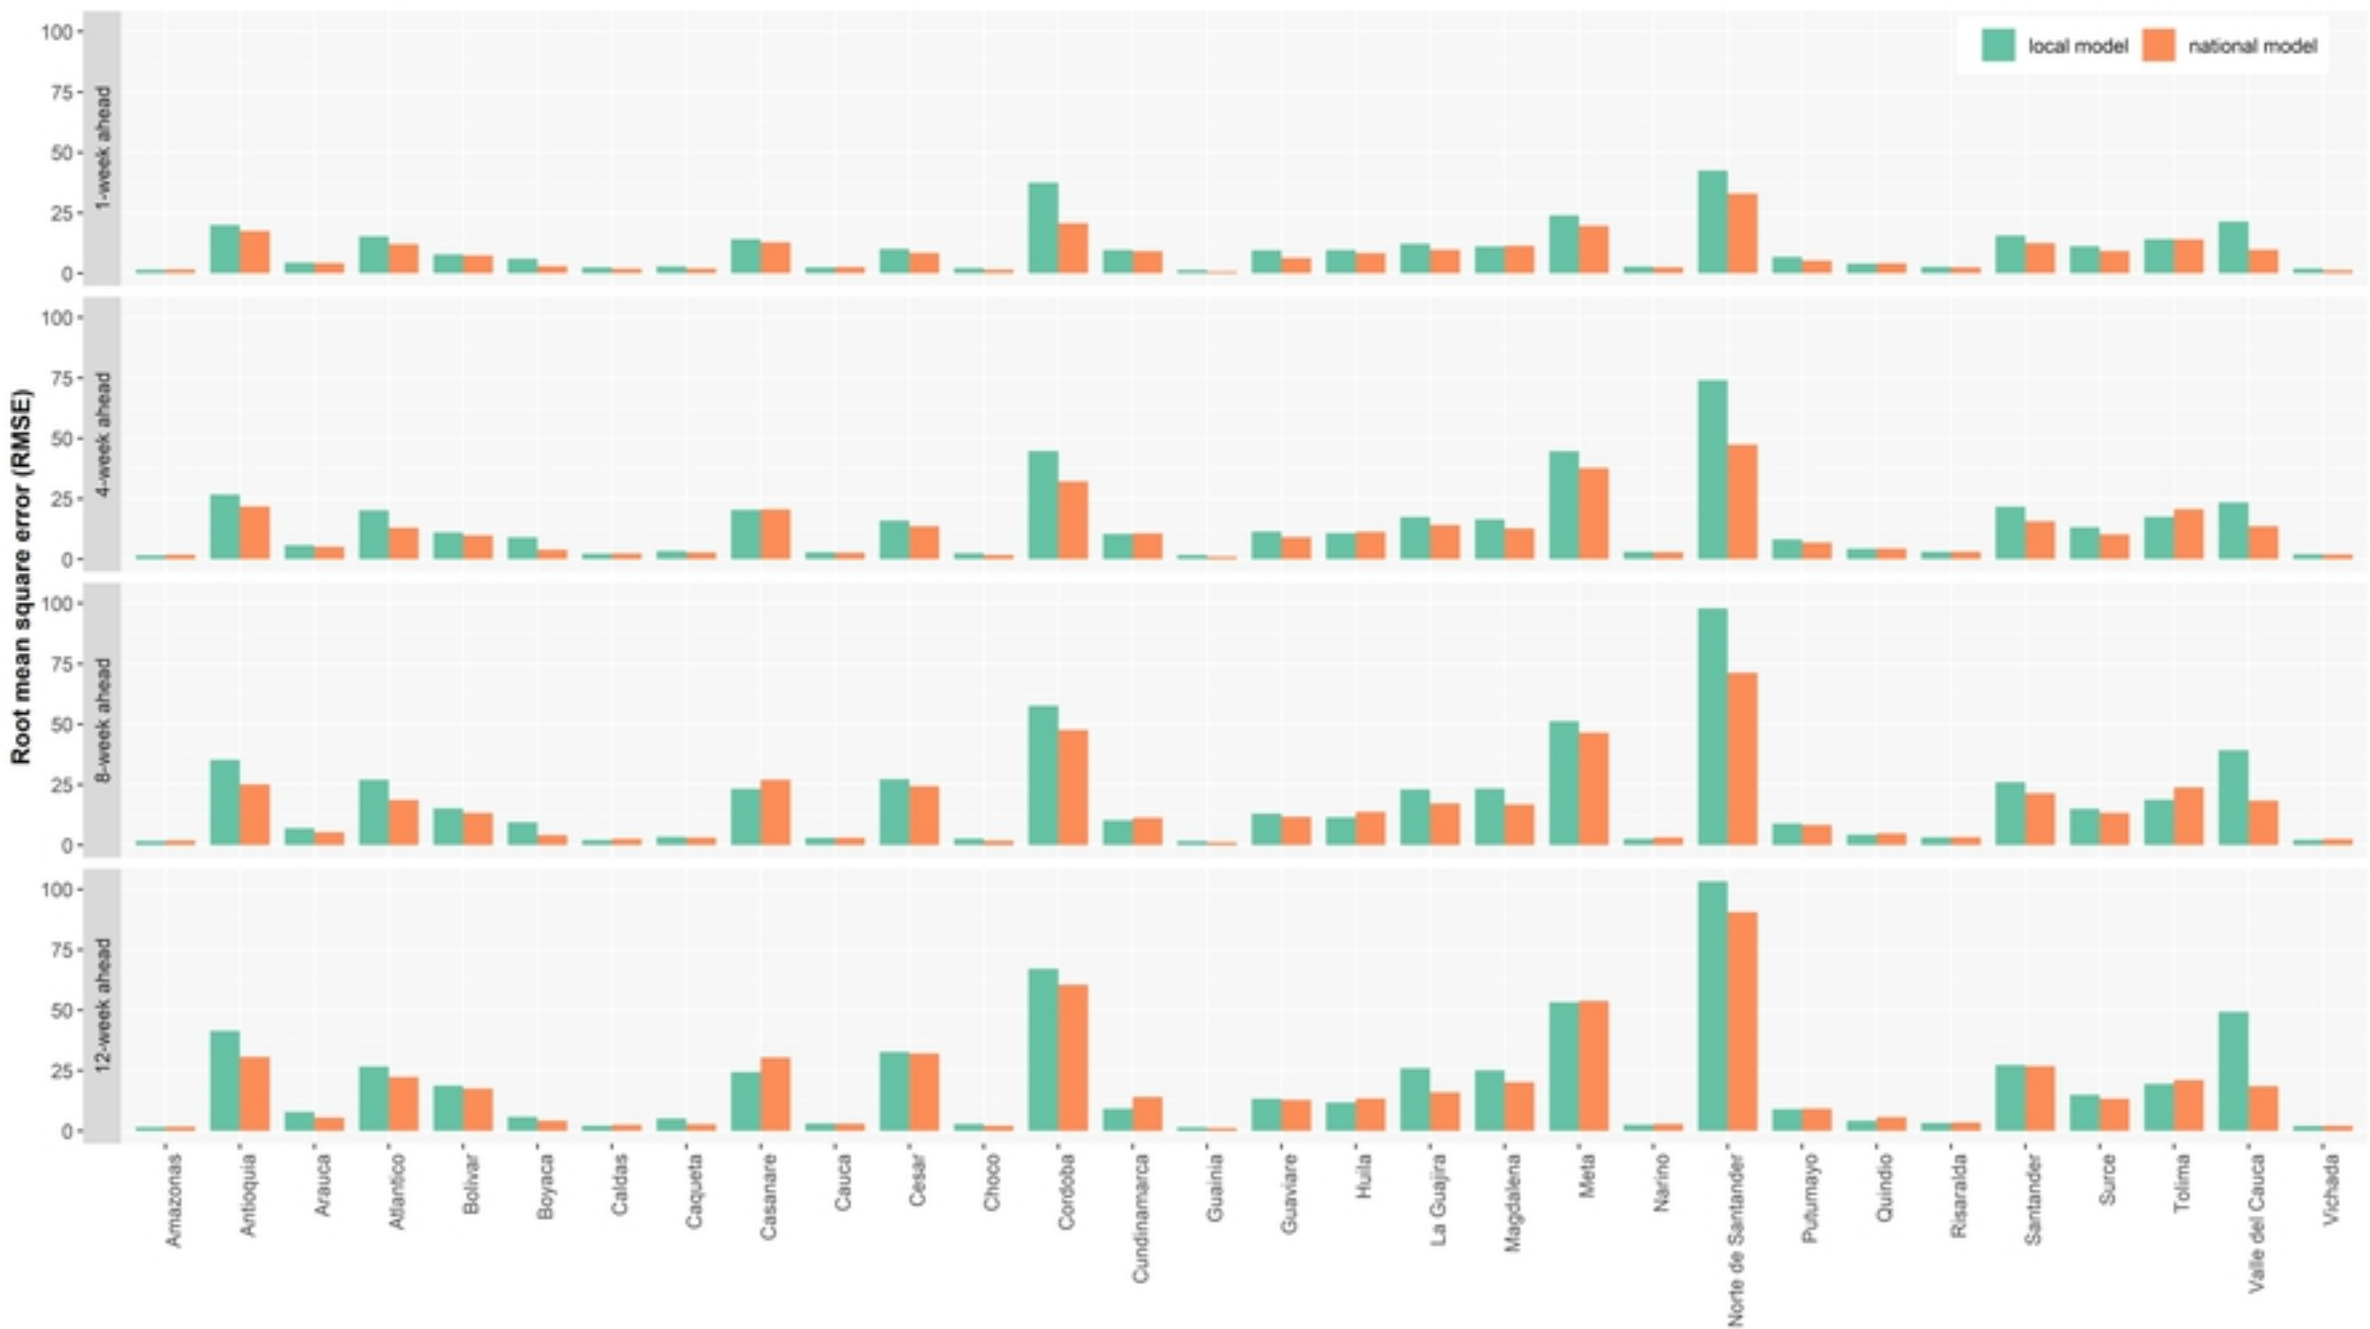

Figure 2

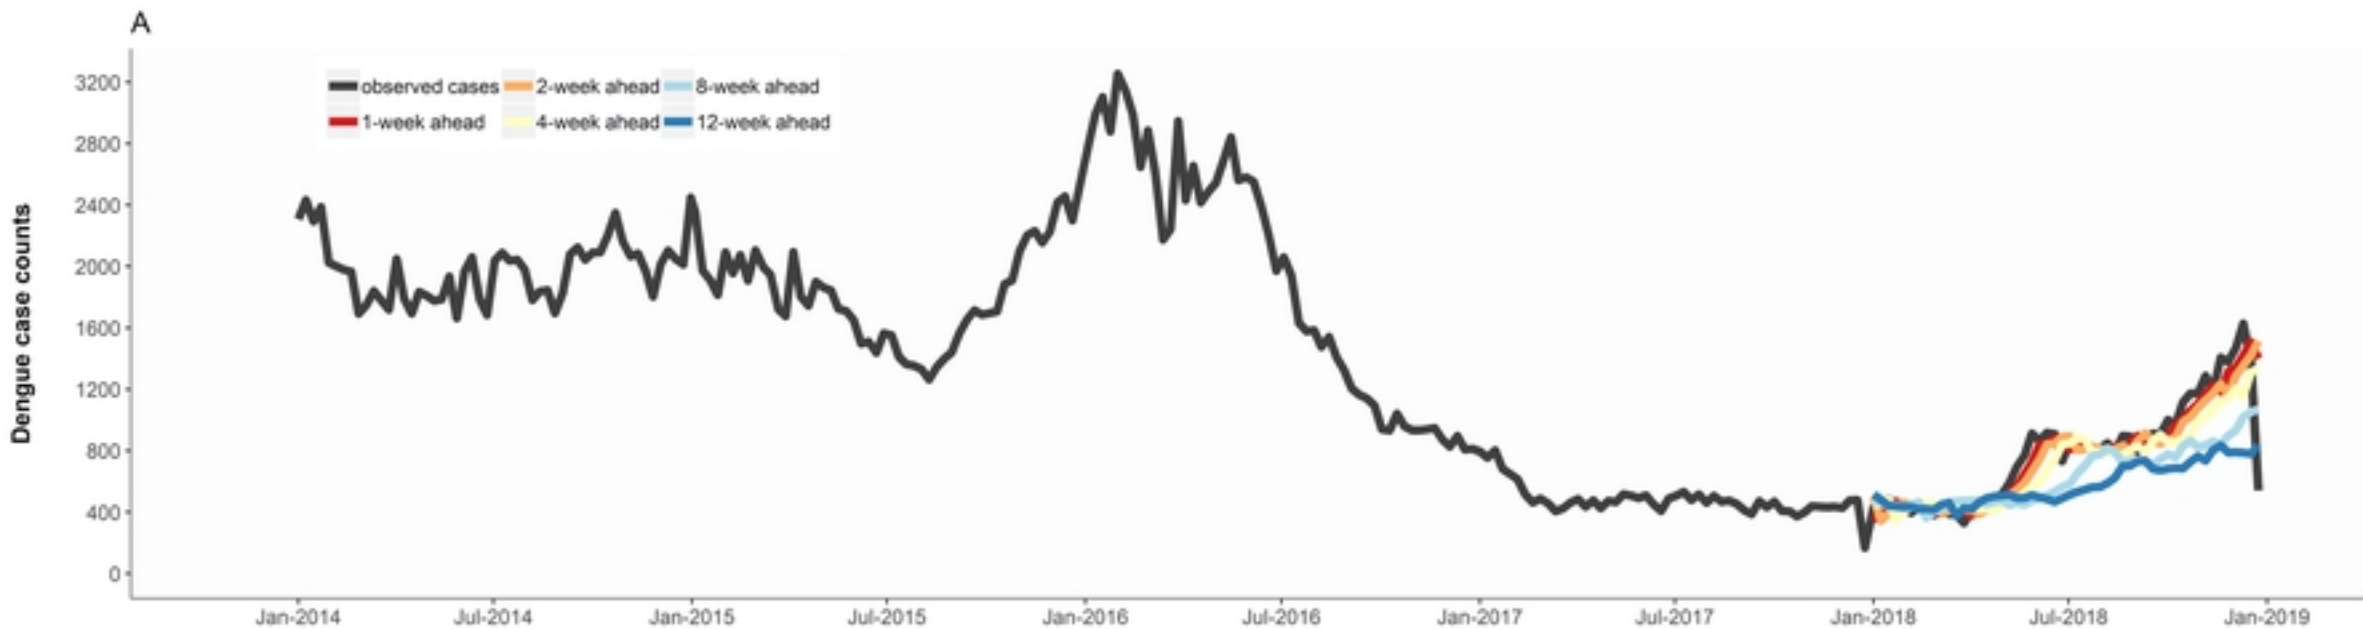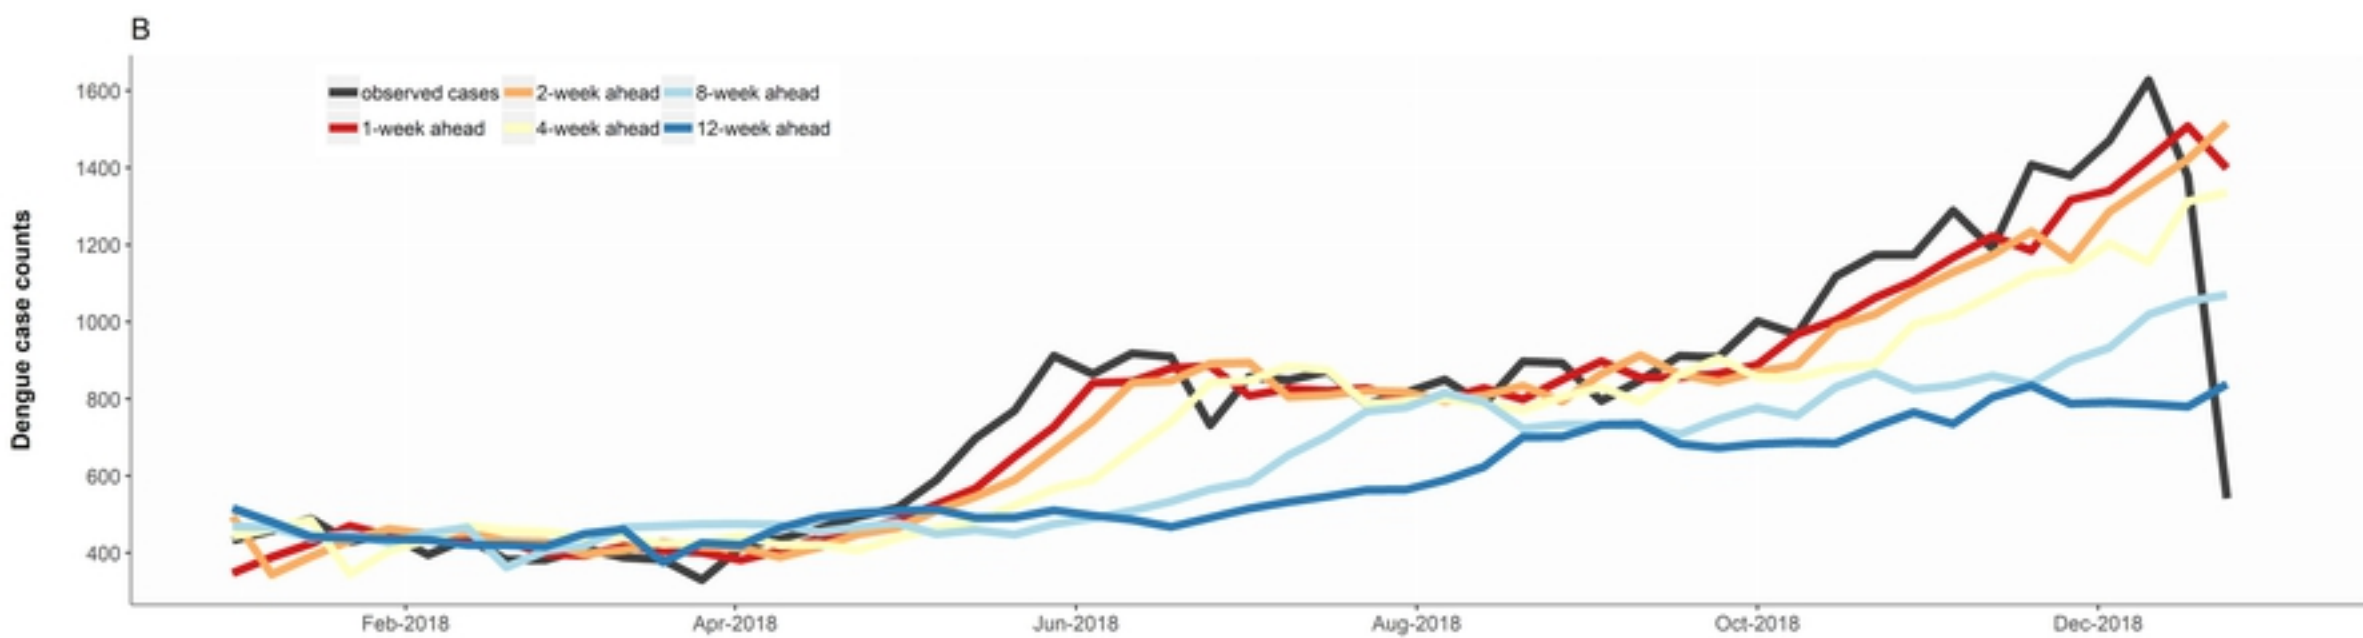

Figure 1
